# Supplementary material for: An aptazyme-based molecular device that converts a small-molecule input into an RNA output
Source: Royal Society of Chemistry journal article supplement (doi:10.1039/c2cc31886e), 2012-01-01
Supplement: c2cc31886e.pdf [file c2cc31886e.pdf]

Electronic Supporting Information  
for  
**Aptazyme-based molecular device that converts a small-molecule input  
to an RNA output**

Shotaro Ayukawa,<sup>a</sup> Yoko Sakai,<sup>a,b</sup> and Daisuke Kiga\*<sup>a</sup>

<sup>a</sup> Department of Computational Intelligence and Systems Science, Tokyo Institute of Technology, 4259  
Nagatsuta-cho, Midori-ku, Yokohama, Japan, 226-8503

<sup>b</sup> Present Address: Department of Life Sciences and Institute of Physics, Graduate School of Arts and  
Sciences, The University of Tokyo, 3-8-1 Komaba, Meguro-ku, Tokyo, Japan, 153-8902

Contents:

|                           |              |
|---------------------------|--------------|
| Experimental Section..... | Page S2-S3   |
| T a b l e S 1 .....       | P a g e S 4  |
| Figure S1.....            | Page S5-S6   |
| F i g u r e S 2 .....     | P a g e S 7  |
| F i g u r e S 3 .....     | P a g e S 8  |
| FigureS4.....             | Page S9-S10  |
| F i g u r e S 5 .....     | P a g e S 10 |
| FigureS6.....             | Page S11     |
| References.....           | Page S11     |

## Experimental Section:

### Materials

All the DNA oligonucleotides were synthesized and OPC-purified by Sigma Aldrich Japan (Hokkaido, Japan) or by Operon Biotechnologies (Tokyo, Japan). DNA oligonucleotides > 50 nucleotides long were purified using additional denaturing polyacrylamide gel electrophoresis with a denaturing gel containing 8% polyacrylamide (acrylamide:bisacrylamide, 29:1) and 8.0 M urea. Ultrapure DNase/RNase-free distilled water was purchased from Invitrogen (Carlsbad, CA, USA). Bst DNA polymerase was purchased from Takara (Tokyo, Japan). KOD plus DNA polymerase and Thermo RNA polymerase were purchased from TOYOBO (Tokyo, Japan). RQ DNase I and SYBR Gold Nucleic Acid Gel Stain were purchased from Invitrogen. Flavin mononucleotide sodium salt (FMN) was purchased from Wako (Osaka, Japan). All other chemicals were of analytical grade and used without further purification. Band intensity was measured using an FLA-5100 fluoroimage analyzer (FUJI Film, Tokyo, Japan).

### *In vitro* transcription of the aptazyme

The DNA template for aptazyme transcription was obtained using polymerase chain reaction (PCR). PCR was performed using KOD plus DNA polymerase according to the manufacturer's instructions in 300  $\mu$ L reaction solution. The reaction solution contained 7.5 pmol forward and reverse templates (Table S1) and 90 pmol forward and reverse primers (Table S1). The PCR product was purified by phenol extraction and ethanol precipitation. The precipitated product was dissolved in 60  $\mu$ L distilled water. The aptazyme was obtained by *in vitro* transcription of DNA templates by using T7 RNA polymerase. The *in vitro* transcription was performed in 150  $\mu$ L reaction solution containing 40 mM Tris-HCl (pH 8.0), 14 mM MgCl<sub>2</sub>, 1 mM Tris (2-carboxyethyl) phosphine (TCEP), 3 mM of each NTP, 0.5 units RNase inhibitor, 2.5 units T7 RNA polymerase, and 60  $\mu$ L purified DNA template in solution. KOH was added to adjust the pH of the solution to 7.8. After incubation at 37°C for 2 h, the solution was incubated at 37°C for an additional 15 min with 1 unit of RQ DNase I. The transcribed aptazyme was purified using a denaturing gel containing 8% polyacrylamide (acrylamide:bisacrylamide, 29:1) and 8.0 M urea. The concentration of the purified aptazyme was determined by absorbance at 260 nm.

### Device transcription assay

Device reactions were performed by incubation at 50°C for 60 min. The reaction buffer for the device contained 40 mM Tris-HCl (pH 8.0), 50 mM NaCl, 33.8 mM MgCl<sub>2</sub>, 2.0 mM TCEP, 0.20 mM of each dNTP, 2.0 mM adenosine triphosphate (ATP), 2.0 mM guanosine triphosphate (GTP), 2.0 mM cytidine triphosphate (CTP), 1.825 mM uridine triphosphate (UTP), and 0.175 mM fluorescein-12-UTP. The concentrations of the aptazyme and DNA subunit 1 were 1.0  $\mu$ M and 0.50

$\mu\text{M}$ , respectively. In the control reaction for producing the appropriate output RNA,  $1.0 \mu\text{M}$  of cIII DNA (Table S1), which had the complementary sequence to domain III, was used as the primer to produce double-stranded promoter. The concentrations of Bst DNA polymerase and Thermo T7 RNA polymerase were  $0.80$  and  $1.25$  units/ $\mu\text{L}$ , respectively. The reaction was stopped with an equal volume of gel loading buffer ( $2\times$  GLB) containing  $8.0$  M urea,  $10\%$  (v/v) glycerol,  $50$  mM ethylenediaminetetraacetic acid (EDTA), and  $0.05\%$  (w/v) bromophenol blue (BPB). Next,  $8.0 \mu\text{L}$  of reaction solution was applied to a denaturing gel containing  $20\%$  polyacrylamide (acrylamide:bisacrylamide,  $29:1$ ) and  $8.0$  M urea. Because of the high amount of output RNA, the control reaction sample was diluted to  $1:20$  before applying to the gel. Tris-borate-EDTA buffer ( $89$  mM Tris-HCl,  $89$  mM boric acid, and  $2$  mM EDTA, pH  $8.3$ ) was used as the running buffer for electrophoresis. The gel was run at a constant voltage of  $250$  V at constant temperature of  $50^\circ\text{C}$ . After electrophoresis, the fluorescein-labeled output RNA in the gel was observed using an FLA-5100 fluoroimage analyzer.

**Table S1.** Oligonucleotide sequences used in this study

| Strand name                                                                                     | DNA sequence                                                                                                                  |
|-------------------------------------------------------------------------------------------------|-------------------------------------------------------------------------------------------------------------------------------|
| DNA subunit 1                                                                                   | 5'-TGC GGC GTA ACT ATCTCTGATCTCCCTATAGTGAGTCGTAT<br>TACGGCGGCCGTTT-3'                                                         |
| cIII DNA                                                                                        | 5'-GAAACGGCCGCC-3'                                                                                                            |
| Forward template for the<br>FMN-dependent aptazyme                                              | 5'- <b>GGTAACACGCATATGTAATACGACTCACTATAGGCCGT</b><br>AGGTTGGAAACGACCCTGATGAGCCTTAGGATATGCTTCGG<br>CAGAAGGACGTCGAAACGGCTCGG-3' |
| Reverse template for the<br>FMN-dependent aptazyme                                              | 5'-GGGAACCGTTTCGACGTCCTTCTGCCGAAGCATATCCTAA<br>GGCTCATCAGGGTCGTTTCCAACCTACG-3'                                                |
| Forward primer for the<br>FMN-dependent aptazyme,<br>cleavage mutant, and<br>interaction mutant | 5'-GGTAACACGCATATGTAATACGACTC-3'                                                                                              |
| Reverse primer for the<br>FMN-dependent aptazyme<br>and cleavage mutant                         | 5'-GGCGGCCGTTTCGACGTCCTTCTG-3'                                                                                                |
| Forward template for the<br>cleavage mutant                                                     | 5'- <b>GGTAACACGCATATGTAATACGACTCACTATAGGCCGT</b><br>AGGTTGGAAACGACCCTGGTGAGCCTTAGGATATG-3'                                   |
| Reverse template for the<br>cleavage mutant                                                     | 5'-GGGAACCGTTTCGACGTCCTTCTGCCGAAGCATATCCTAA<br>GGCTCACCAGGGTCGTTTCCAACCTACG-3'                                                |
| Forward template for the<br>interaction mutant                                                  | 5'- <b>GGTAACACGCATATGTAATACGACTCACTATAGGCCGT</b><br>AGGTTGGAAACGACCCTGATGAGCCTTAGGATATG-3'                                   |
| Reverse template for the<br>interaction mutant                                                  | 5'-GGGAACCGTTTCGACGTCCTTCTGCCGAAGCATATCCTAA<br>GGCTCATCAGGGTCGTTTCCAACCTACG-3'                                                |
| Reverse primer for the<br>interaction mutant                                                    | 5'-GGCGGCCGTTTCGACGTCCTTCTG-3'                                                                                                |
| TAMRA-labeled<br>DNA probe                                                                      | 5'-TGC GGC GTA ACT ATCTCTGATCTCCC-3'-TAMRA                                                                                    |
| Complementary<br>subunit 1                                                                      | DNA 5'-AAACGGCCGCCGTAATACGACTCACTATAGGGAGATCAG<br>AGATAGTTACGCCGCA-3'                                                         |

The **bold letters** indicate the T7 promoter sequence

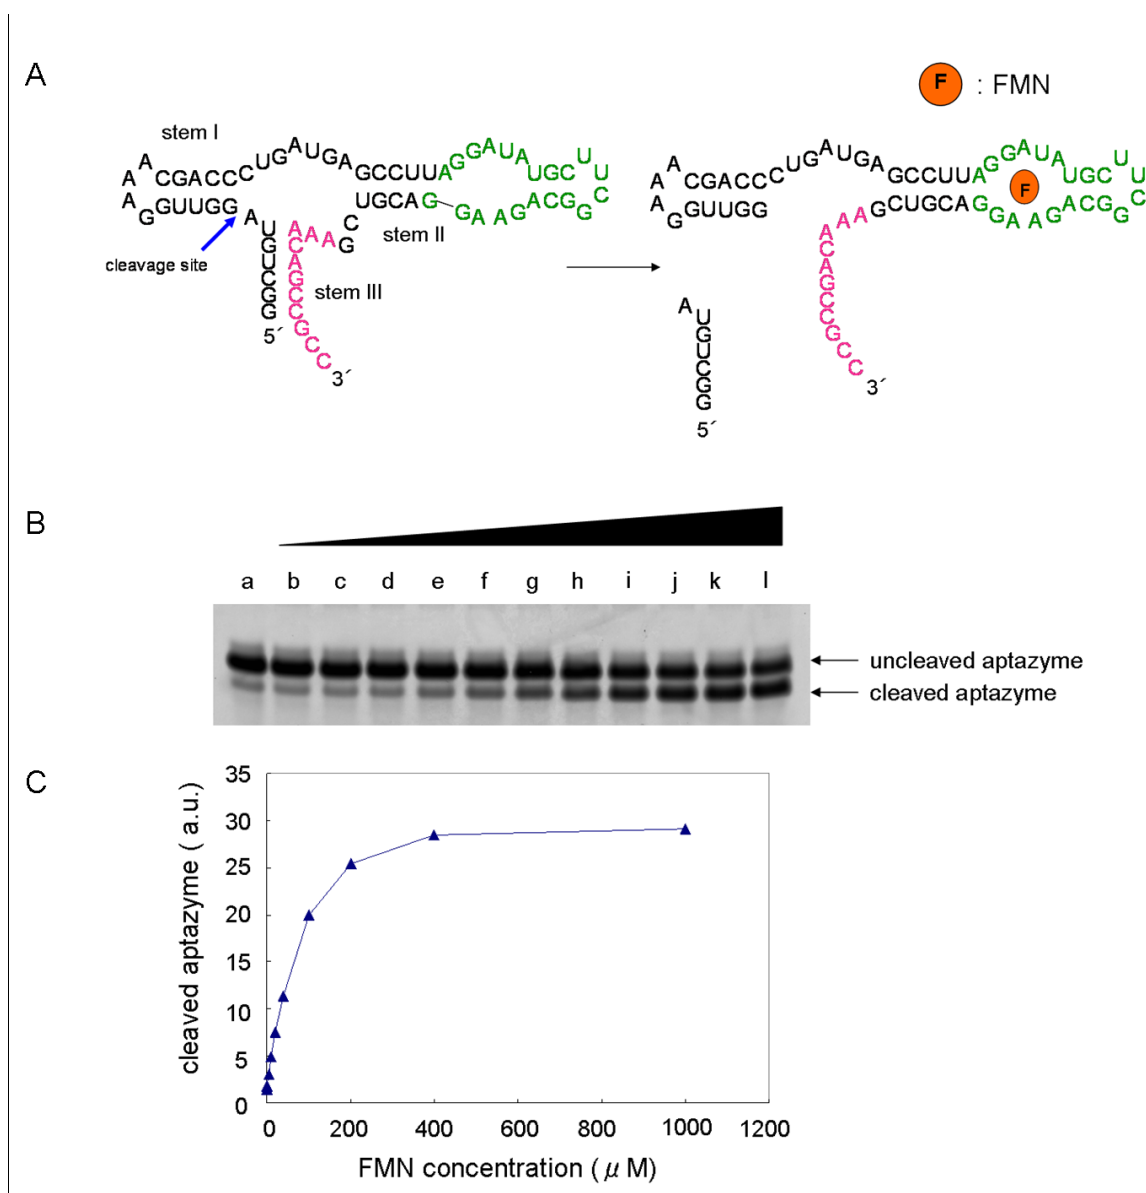

**Figure S1.** Design and analysis of the aptazyme

**A) Design of the FMN-dependent aptazyme**

Based on the flavin mononucleotide (FMN)-dependent aptazyme constructed by Soukup *et al.*,<sup>1</sup> an aptazyme suitable for our purpose was constructed. By circular permutation, the 5' and 3' termini that had been on the stem I of the parent aptazyme were moved to stem III. The GAAA loop that had been on stem III of the parent aptazyme was moved to stem I. Moreover, a 3-nucleotide (nt) overhang sequence—GCC—was added to the 3' terminus to stabilize the hybridization between the aptazyme and DNA subunit 1. The resultant aptazyme had a 6-nt stem III. Green nucleotides represent the anti-FMN aptamer domain. Pink nucleotides represent the sequence that hybridized with DNA subunit 1. The cleavage site is indicated by a blue arrow.

Binding of an FMN molecule to the aptamer domain changed the conformation of the aptazyme into

a self-cleaving form. In the cleaved aptazyme, a fragment dissociates from its complementary sequence on the aptazyme.

B) Gel analysis of the self-cleaved aptazyme in the presence of different FMN concentrations ( $\mu\text{M}$ ): (a) 0, (b) 0.04, (c) 0.4, (d) 1.0, (e) 4.0, (f) 10, (g) 20, (h) 40, (i) 100, (j) 200, (k) 400, and (l) 1,000. The reaction solution for the aptazyme was incubated at  $50^\circ\text{C}$  for 60 min. The reaction buffer contained 40 mM Tris-HCl (pH 8.0), 50 mM NaCl, 33.8 mM  $\text{MgCl}_2$ , 2.0 mM Tris (2-carboxyethyl) phosphine (TCEP), 0.20 mM each dNTP, and 2.0 mM NTP. The concentration of the aptazyme was 1.0  $\mu\text{M}$ . The reactions were stopped with an equal volume of  $2\times$  gel loading buffer containing 8.0 M urea, 10% (v/v) glycerol, 50 mM ethylenediaminetetraacetic acid (EDTA), and 0.05% (w/v) bromophenol blue. Next, 8.0  $\mu\text{L}$  of the solution was applied to a denaturing gel containing 8.0% polyacrylamide (acrylamide:bisacrylamide, 29:1) and 8.0 M urea. Tris-borate-EDTA buffer (89 mM Tris-HCl, 89 mM boric acid, 2 mM EDTA, pH 8.3) was used as the running buffer for electrophoresis. The gel was run at a constant voltage of 250 V in a chamber set at  $50^\circ\text{C}$ . After electrophoresis, the gel was stained with SYBR Gold Nucleic Acid Gel Stain and observed on an FLA-5100 fluoroimage analyzer.

C) A plot of the intensity of the cleaved aptazyme band as a function of the input FMN concentration

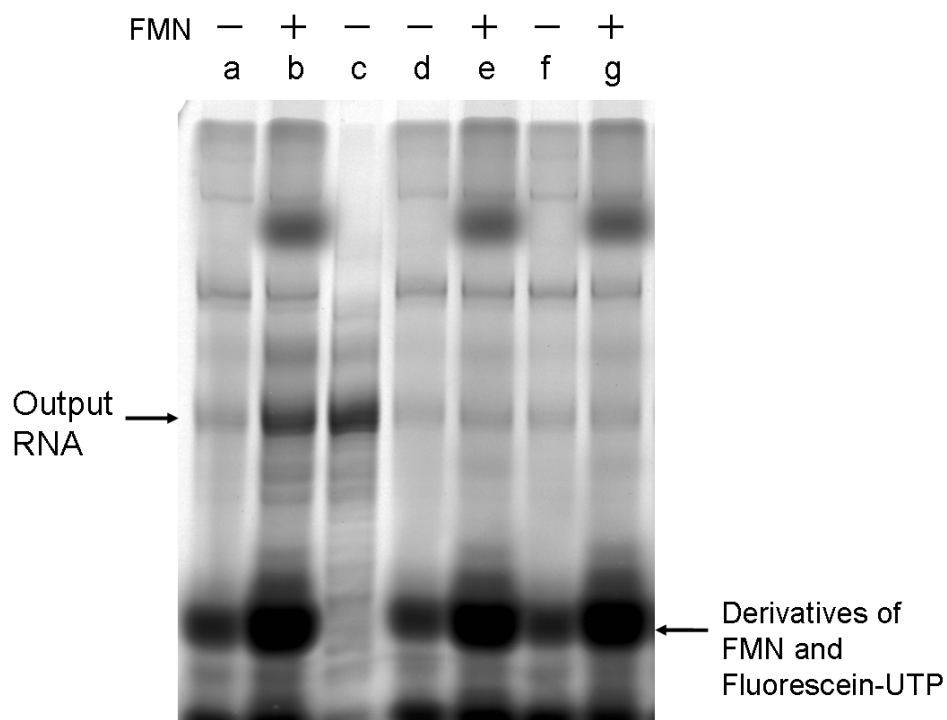

**Figure S2.** Full image of the gel showing the operation of the device dependent on the flavin mononucleotide (FMN) input: (a) no input for the FMN-dependent aptazyme, (b) 400  $\mu\text{M}$  FMN for the FMN-dependent aptazyme, (c) control reaction to produce the appropriate output RNA, (d) no input for the cleavage mutant, (e) 400  $\mu\text{M}$  FMN for the cleavage mutant, (f) no input for the interaction mutant, and (g) 400  $\mu\text{M}$  FMN for the interaction mutant.

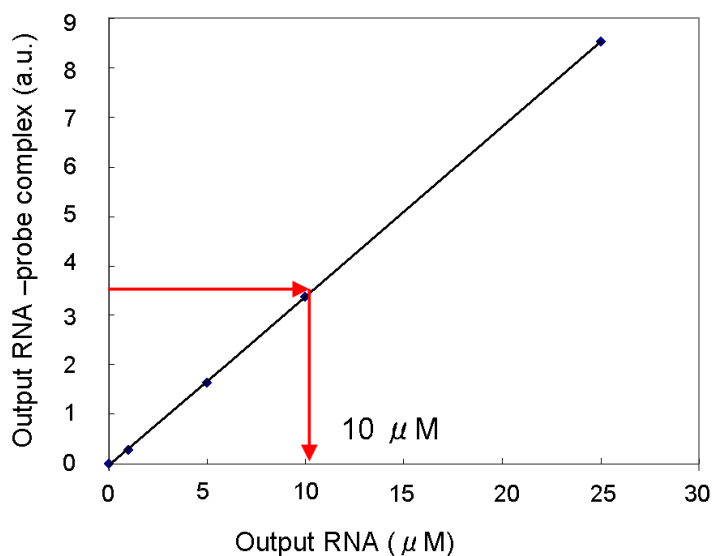

**Figure S3.** Quantification of the output RNA generated by the device in response to flavin mononucleotide (FMN) input.

To determine the concentration of output RNA produced in response to FMN input, a standard curve of the output RNA-DNA probe complex with the respective output RNA concentrations was constructed. To make the standard curve, serially diluted solutions of purified output RNA were mixed with 25  $\mu\text{M}$  TAMRA-labeled DNA probe (Table S1) that specifically hybridizes with the output RNA. The purified output RNA was prepared by *in vitro* transcription under reaction conditions similar to that for the production of the aptazyme. For the *in vitro* transcription, we used 0.50  $\mu\text{mol}$  of the double-stranded DNA subunit 1; the Complementary DNA subunit 1 strand was used as the template for output RNA. After incubation at room temperature for 10 min, equal volume of 2 $\times$  gel loading buffer containing 10% (v/v) glycerol and 0.05% (w/v) bromophenol blue (BPB) was added to the solutions. Next, 5.0  $\mu\text{L}$  of the solution was applied to a non-denaturing gel containing 20% polyacrylamide (acrylamide:bisacrylamide, 29:1). Gel electrophoresis was performed as described in Figure S1B, except that it was run at room temperature. After electrophoresis, the band intensities of the output RNA-DNA probe complexes in the gel were measured using an FLA-5100 fluoroimage analyzer. The band intensities of the output RNA-DNA probe complexes were plotted against the output RNA concentration (black line). The red lines highlight the concentration of output RNA produced by the device transcription assay in the presence of 400  $\mu\text{M}$  FMN. From this result, the concentration of output RNA generated by the device was determined to be 10  $\mu\text{M}$ .



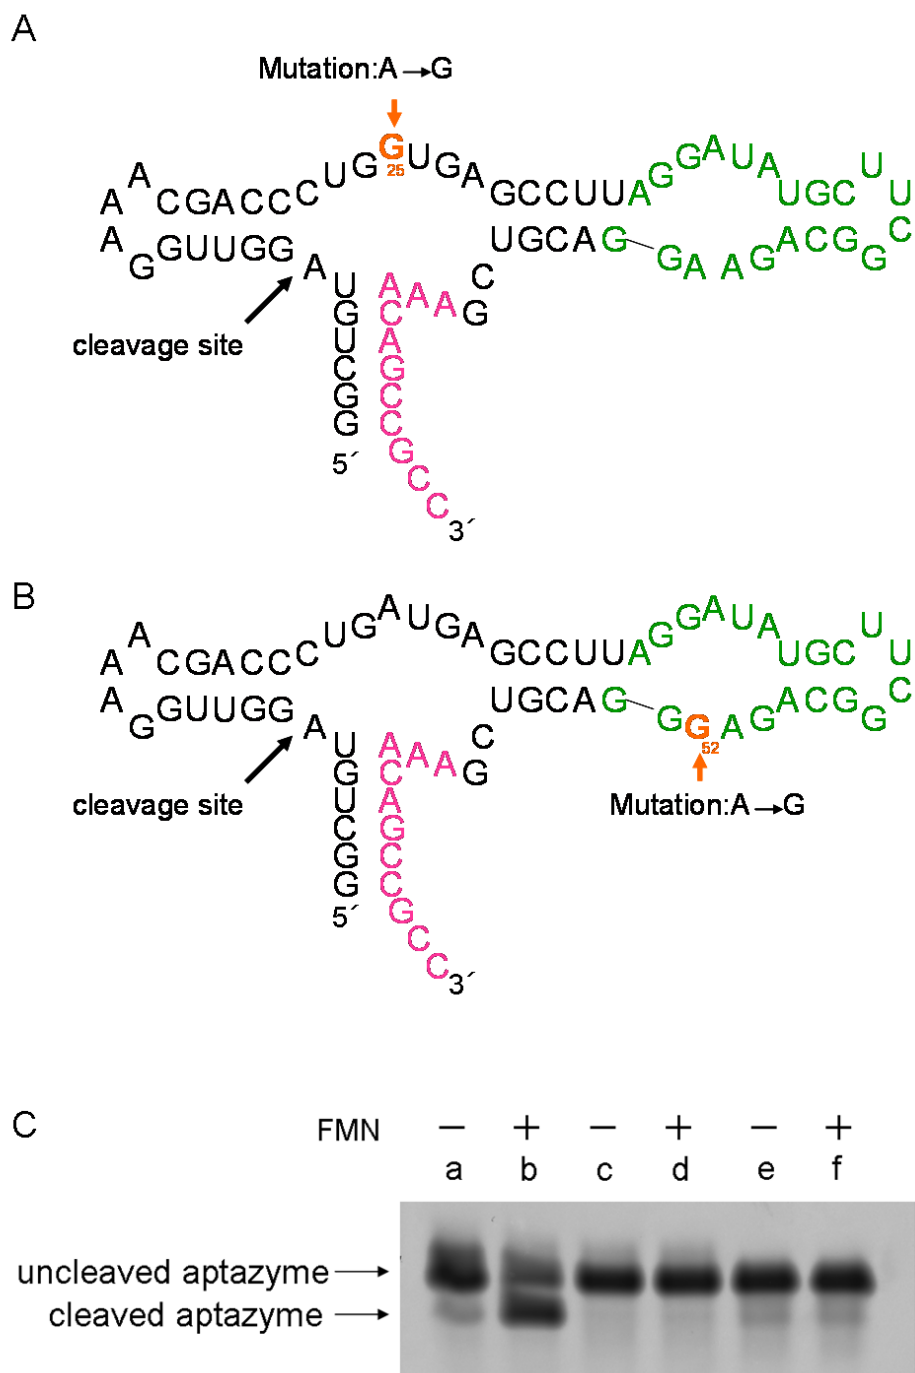

**Figure S4.** Design and analysis of aptazyme mutants

A) Design of a cleavage mutant of the flavin mononucleotide (FMN)-dependent aptazyme

To construct an aptazyme mutant lacking the self-cleavage activity, we introduced a mutation into the catalytic pocket of the hammerhead ribozyme. We substituted A for G at position 25 of the

aptazyme because this substitution is known to abolish the cleavage activity of a hammerhead ribozyme.<sup>2</sup>

B) Design of an interaction mutant of the FMN-dependent aptazyme

To construct a mutant aptazyme lacking the binding activity to FMN, we introduced a mutation in the FMN-binding aptamer. We substituted A for G at position 52 of the aptazyme because it is one of the conserved nucleotides of the FMN-binding aptamer.<sup>3</sup>

C) Gel analysis of the self-cleaved aptazyme mutants in the absence and presence of FMN input: (a) no input for the FMN-dependent aptazyme, (b) 400  $\mu$ M FMN for the FMN-dependent aptazyme, (c) no input for the cleavage mutant, (d) 400  $\mu$ M FMN for the cleavage mutant, (e) no input for the interaction mutant, and (f) 400  $\mu$ M FMN for the interaction mutant.

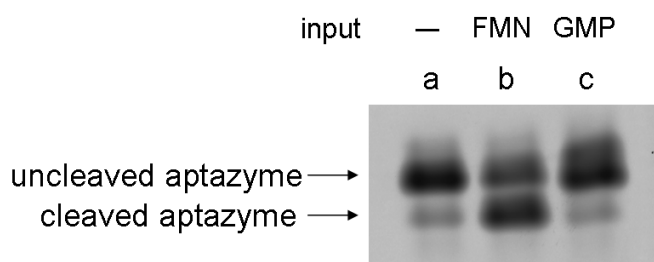

**Figure S5.** Gel analysis of the self-cleaved aptazyme in the presence of a control input: (a) no input, (b) 400  $\mu$ M flavin mononucleotide (FMN), and (c) 400  $\mu$ M guanine monophosphate (GMP)

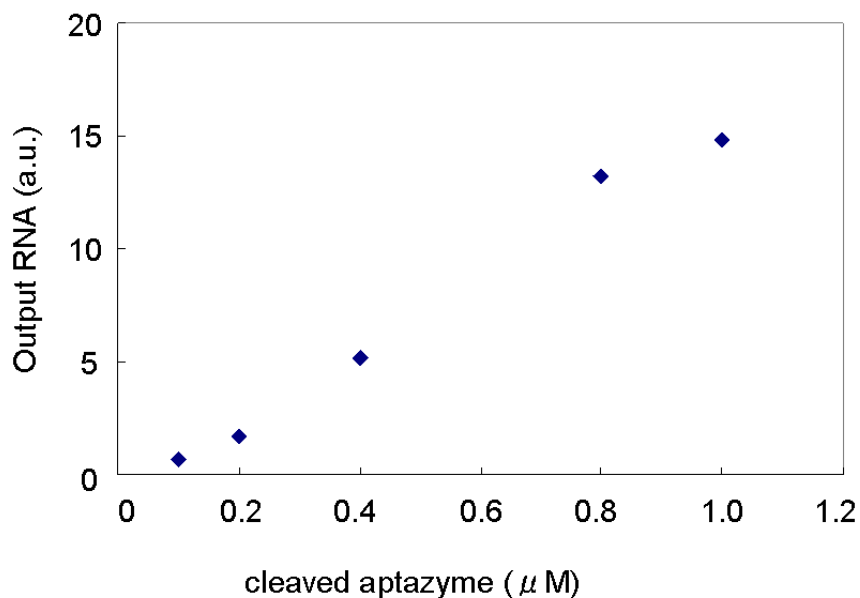

**Figure S6.** The output RNA generated in response to varying concentrations of cleaved aptazyme in the absence of flavin mononucleotide (FMN).

Output RNA generation in response to the input of cleaved aptazyme, instead of FMN, was measured. The reaction conditions were the same as those of the device transcription assay described previously. As the concentration of the cleaved aptazyme increased, the amount of the output RNA increased.

#### References

- 1 G. A. Soukup and R. R. Breaker, *Proc. Natl. Acad. Sci. U. S. A.*, 1999, **96**, 3584.
- 2 D. E. Ruffner, G. D. Stormo and O. C. Uhlenbeck, *Biochemistry*, 1990, **29**, 10695.
- 3 P. Fan, A. K. Suri, R. Fiala, D. Live and D. J. Patel, *J. Mol. Biol.*, 1996, **258**, 480.
